# Supplementary material for: Molecular Characterization and Expression Analysis of Four Janus Kinases (JAK1, JAK2a, JAK3 and TYK2) from Golden Pompano (Trachinotus ovatus)
Source: MDPI journal article supplement (doi:10.3390/fishes8050245), 2023-05-08
Supplement: s1 [file s1]

**Supplementary Figure S1. Comparison of protein sequences of JAKs between golden pompano, large yellow croaker, zebrafish and human, and their Gene accession numbers are listed in Figure 5. The protein domains are predicted by Simple Modular Architecture Research Tool (SMART) (<http://smart.emble-heidelberg.de>). The FERM domain is marked in green. The STYKc domain of human is marked in red and the Tyrkc domain is marked in blue.**

|          |                 |                           |            |             |            |            |          |           |                  |            |             |         |           |              |                |        |        |          |           |       |           |         |           |     |     |    |    |    |     |    |   |   |   |   |   |   |        |   |   |   |   |     |   |   |     |   |   |   |   |   |   |        |     |    |   |   |   |   |   |     |    |   |   |   |   |   |   |   |   |     |     |     |   |   |     |   |   |     |
|----------|-----------------|---------------------------|------------|-------------|------------|------------|----------|-----------|------------------|------------|-------------|---------|-----------|--------------|----------------|--------|--------|----------|-----------|-------|-----------|---------|-----------|-----|-----|----|----|----|-----|----|---|---|---|---|---|---|--------|---|---|---|---|-----|---|---|-----|---|---|---|---|---|---|--------|-----|----|---|---|---|---|---|-----|----|---|---|---|---|---|---|---|---|-----|-----|-----|---|---|-----|---|---|-----|
| trJAK2a  | --MACILLTMDPPTS | GPTANHNDLCPDLNTAAGCDPKQ-- | VIDATQ     | LT          | THLYNLGKDG | GGGGRAKSS  | ESVLTFFP | PEYVAE    | ETCIAAAKAC       | 87         |             |         |           |              |                |        |        |          |           |       |           |         |           |     |     |    |    |    |     |    |   |   |   |   |   |   |        |   |   |   |   |     |   |   |     |   |   |   |   |   |   |        |     |    |   |   |   |   |   |     |    |   |   |   |   |   |   |   |   |     |     |     |   |   |     |   |   |     |
| LatJAK2a | --MACILLTMDPPTS | GPTPHQNGLCPLHDPAGTDPKQE   | ATDATQ     | LT          | THLYNLGKDG | GGGGAAGKSS | ESVLTFFP | PEYVAE    | ETCIAAAKAC       | 88         |             |         |           |              |                |        |        |          |           |       |           |         |           |     |     |    |    |    |     |    |   |   |   |   |   |   |        |   |   |   |   |     |   |   |     |   |   |   |   |   |   |        |     |    |   |   |   |   |   |     |    |   |   |   |   |   |   |   |   |     |     |     |   |   |     |   |   |     |
| DanJAK2a | -----           | -----                     | -----      | -----       | -----      | -----      | -----    | -----     | -----            | 52         |             |         |           |              |                |        |        |          |           |       |           |         |           |     |     |    |    |    |     |    |   |   |   |   |   |   |        |   |   |   |   |     |   |   |     |   |   |   |   |   |   |        |     |    |   |   |   |   |   |     |    |   |   |   |   |   |   |   |   |     |     |     |   |   |     |   |   |     |
| HomJAK2  | MGMACLTMT       | TEG                       | STSTSIYQN  | -----       | GD         | ISGNANSMQ  | IDP-VLQ  | VYLYHSLG  | KSE-----ADYLTFFP | SEYVAE     | ETCIAAAKAC  | 75      |           |              |                |        |        |          |           |       |           |         |           |     |     |    |    |    |     |    |   |   |   |   |   |   |        |   |   |   |   |     |   |   |     |   |   |   |   |   |   |        |     |    |   |   |   |   |   |     |    |   |   |   |   |   |   |   |   |     |     |     |   |   |     |   |   |     |
| trJAK3   | -----           | MD                        | SEESAPLVIR | -----       | DR         | GSQRSSST   | GP       | SLQVHI    | YFFPTTKEE-----   | AT         | YISSGQ      | ISAENV  | CIQAGKKC  | 66           |                |        |        |          |           |       |           |         |           |     |     |    |    |    |     |    |   |   |   |   |   |   |        |   |   |   |   |     |   |   |     |   |   |   |   |   |   |        |     |    |   |   |   |   |   |     |    |   |   |   |   |   |   |   |   |     |     |     |   |   |     |   |   |     |
| LatJAK3  | -----           | MD                        | SEESAPLVIR | -----       | DR         | GSQRSSST   | GP       | SLQVHI    | YFFPTTKEE-----   | TT         | QISCGQ      | IAEN    | VCIOAGKKC | 66           |                |        |        |          |           |       |           |         |           |     |     |    |    |    |     |    |   |   |   |   |   |   |        |   |   |   |   |     |   |   |     |   |   |   |   |   |   |        |     |    |   |   |   |   |   |     |    |   |   |   |   |   |   |   |   |     |     |     |   |   |     |   |   |     |
| DanJAK3  | -----           | MS                        | EEEVPLMKS  | -----       | ER         | AGSQRSS    | CD       | S-----ALQ | HLIYSP           | SLNSE----- | TT          | FSIPTGH | VT        | ABSCVCLAAKAS | 62             |        |        |          |           |       |           |         |           |     |     |    |    |    |     |    |   |   |   |   |   |   |        |   |   |   |   |     |   |   |     |   |   |   |   |   |   |        |     |    |   |   |   |   |   |     |    |   |   |   |   |   |   |   |   |     |     |     |   |   |     |   |   |     |
| HomJAK3  | -----           | MA                        | PPSEETPLIP | -----       | QR         | SCSL       | STEAG    | -----     | ALH              | LLPAR      | -GPGPP----- | QR      | LSFS      | FGD          | HLAEDLCVQAAKAS | 61     |        |          |           |       |           |         |           |     |     |    |    |    |     |    |   |   |   |   |   |   |        |   |   |   |   |     |   |   |     |   |   |   |   |   |   |        |     |    |   |   |   |   |   |     |    |   |   |   |   |   |   |   |   |     |     |     |   |   |     |   |   |     |
| trJAK1   | --MPTLWVME      | SRQLCGKMRRS               | -----      | NK          | RAQLSS     | PTT        | TLGL     | ETHFY     | SPD-----         | IH         | QLEYL       | KGCY    | TABE      | LCVDAAKKC    | 68             |        |        |          |           |       |           |         |           |     |     |    |    |    |     |    |   |   |   |   |   |   |        |   |   |   |   |     |   |   |     |   |   |   |   |   |   |        |     |    |   |   |   |   |   |     |    |   |   |   |   |   |   |   |   |     |     |     |   |   |     |   |   |     |
| LatJAK1  | --MTTLWVME      | SRQLCGKMRRS               | -----      | SK          | RTQLSC     | SP         | TT       | TLGL      | ETHFY            | TPD-----   | VH          | QLEYF   | FKGCY     | TABE         | LCVDAAKKC      | 68     |        |          |           |       |           |         |           |     |     |    |    |    |     |    |   |   |   |   |   |   |        |   |   |   |   |     |   |   |     |   |   |   |   |   |   |        |     |    |   |   |   |   |   |     |    |   |   |   |   |   |   |   |   |     |     |     |   |   |     |   |   |     |
| DanJAK1  | --MPELAVMD      | GRQLCVKMKK                | -----      | QR          | KAEM       | TIP        | TAMK     | GL        | ETHFY            | LAD-----   | TH          | QLEFF   | KAC       | Y            | TABDLCVEAAKRC  | 66     |        |          |           |       |           |         |           |     |     |    |    |    |     |    |   |   |   |   |   |   |        |   |   |   |   |     |   |   |     |   |   |   |   |   |   |        |     |    |   |   |   |   |   |     |    |   |   |   |   |   |   |   |   |     |     |     |   |   |     |   |   |     |
| HomJAK1  | -----           | MA                        | FAKMR      | -----       | SK         | TEVN       | LEA      | PE        | GP               | VE         | IF          | Y       | LSD-----  | RE           | PL             | LGSGEY | TABE   | LCIRAQAC | 56        |       |           |         |           |     |     |    |    |    |     |    |   |   |   |   |   |   |        |   |   |   |   |     |   |   |     |   |   |   |   |   |   |        |     |    |   |   |   |   |   |     |    |   |   |   |   |   |   |   |   |     |     |     |   |   |     |   |   |     |
| trTYK2   | -----           | MS                        | RNWSKRSR   | -----       | TG         | AFPSQ      | SE       | PPK       | GGQ              | GH         | LLFW        | TK--    | DG-----   | EK           | Y              | SHT    | SGK    | VTABE    | LCISAAEAV | 61    |           |         |           |     |     |    |    |    |     |    |   |   |   |   |   |   |        |   |   |   |   |     |   |   |     |   |   |   |   |   |   |        |     |    |   |   |   |   |   |     |    |   |   |   |   |   |   |   |   |     |     |     |   |   |     |   |   |     |
| LatTYK2  | -----           | MS                        | PTM        | PRIGMSKRSR  | -----      | PG         | SFLN     | QIE       | PP               | QD         | Q           | GH      | LLFW      | TK--         | EG-----        | ER     | Y      | SHT      | SGK       | VTABE | LCISAAEAV | 65      |           |     |     |    |    |    |     |    |   |   |   |   |   |   |        |   |   |   |   |     |   |   |     |   |   |   |   |   |   |        |     |    |   |   |   |   |   |     |    |   |   |   |   |   |   |   |   |     |     |     |   |   |     |   |   |     |
| DanTYK2  | -----           | MY                        | RRGRSRRSKK | -----       | AG         | TSK        | Q        | SE        | GP--             | --GV       | H           | LLFW    | TK--      | DG-----      | ER             | CL     | SY     | K        | GE        | VTABE | LCISAAEAV | 60      |           |     |     |    |    |    |     |    |   |   |   |   |   |   |        |   |   |   |   |     |   |   |     |   |   |   |   |   |   |        |     |    |   |   |   |   |   |     |    |   |   |   |   |   |   |   |   |     |     |     |   |   |     |   |   |     |
| HomTYK2  | -----           | MP                        | L          | RHWGMARGSKP | -----      | VG         | DGA      | Q         | MAAM             | G--        | GL          | K       | LLH       | WAG          | PGGG-----      | EP     | W      | T        | F         | SE    | SS        | TABE    | LCISAAEAV | 64  |     |    |    |    |     |    |   |   |   |   |   |   |        |   |   |   |   |     |   |   |     |   |   |   |   |   |   |        |     |    |   |   |   |   |   |     |    |   |   |   |   |   |   |   |   |     |     |     |   |   |     |   |   |     |
| trJAK2a  | GIAPVYCN        | LFG                       | MRES       | DR          | IE         | PP         | NHIF     | KL        | DQ               | SASE       | T           | LF      | RIRY      | YP           | PG             | WYNN   | NTNS   | SFY-AH   | RY        | GV    | SK        | GM----- | ESP       | V   | IDD | DC | VM | YQ | 166 |    |   |   |   |   |   |   |        |   |   |   |   |     |   |   |     |   |   |   |   |   |   |        |     |    |   |   |   |   |   |     |    |   |   |   |   |   |   |   |   |     |     |     |   |   |     |   |   |     |
| LatJAK2a | GIAPVYCN        | LFG                       | MRES       | DR          | IE         | PP         | NHIF     | KL        | DQ               | SASE       | T           | LF      | RIRY      | YP           | PG             | WYNN   | NTNS   | SFY-AH   | RY        | GV    | SK        | GM----- | ESP       | V   | IDD | DC | VM | YQ | 167 |    |   |   |   |   |   |   |        |   |   |   |   |     |   |   |     |   |   |   |   |   |   |        |     |    |   |   |   |   |   |     |    |   |   |   |   |   |   |   |   |     |     |     |   |   |     |   |   |     |
| DanJAK2a | GVSPVHCAL       | FGL                       | MRES       | DR          | IE         | PP         | NHIF     | KL        | DQ               | SASE       | T           | LF      | RIRY      | YP           | PG             | WYNN   | NTNS   | SFY-AH   | RY        | GV    | SK        | GM----- | ESP       | V   | IDD | DC | VM | YQ | 130 |    |   |   |   |   |   |   |        |   |   |   |   |     |   |   |     |   |   |   |   |   |   |        |     |    |   |   |   |   |   |     |    |   |   |   |   |   |   |   |   |     |     |     |   |   |     |   |   |     |
| HomJAK2  | GITP            | VYHNL                     | FA         | L           | ASE        | DL         | S        | Y         | W                | PP         | NH          | L       | E         | K            | SEEP--         | VK     | Y      | Y        | R         | F     | R         | F       | FP        | SS  | MF  | Q  | ES | R  | A-- | SY | F | S | L | S | K | G | R----- | I | F | A | V | L   | D | Y | 153 |   |   |   |   |   |   |        |     |    |   |   |   |   |   |     |    |   |   |   |   |   |   |   |   |     |     |     |   |   |     |   |   |     |
| trJAK3   | GILP            | VYLS                      | L          | F           | G          | A          | S        | S         | D                | S          | F           | W       | Y         | P            | P              | S      | H      | V        | E         | N     | T         | D       | E         | N-- | LQ  | H  | R  | F  | R   | F  | F | P | G | N | W | Y | G      | E | G | P | R | Q-- | S | Y | R   | Y | S | L | T | R | D | R----- | I   | S  | P | V | L | D | Y | 142 |    |   |   |   |   |   |   |   |   |     |     |     |   |   |     |   |   |     |
| LatJAK3  | GILP            | VYLS                      | L          | F           | G          | A          | S        | S         | D                | S          | F           | W       | Y         | P            | P              | S      | H      | V        | E         | N     | T         | D       | E         | N-- | LQ  | H  | R  | F  | R   | F  | F | P | G | N | W | Y | G      | E | G | P | R | Q-- | S | Y | R   | Y | S | L | T | R | D | R----- | I   | S  | P | V | L | D | Y | 142 |    |   |   |   |   |   |   |   |   |     |     |     |   |   |     |   |   |     |
| DanJAK3  | GILP            | VYHNL                     | FA         | L           | ASE        | DL         | S        | Y         | W                | PP         | NH          | L       | E         | K            | SEEP--         | VK     | Y      | Y        | R         | F     | R         | F       | FP        | SS  | MF  | Q  | ES | R  | A-- | SY | F | S | L | S | K | G | R----- | I | F | A | V | L   | D | Y | 138 |   |   |   |   |   |   |        |     |    |   |   |   |   |   |     |    |   |   |   |   |   |   |   |   |     |     |     |   |   |     |   |   |     |
| HomJAK3  | GILP            | VYHNL                     | FA         | L           | ASE        | DL         | S        | Y         | W                | PP         | NH          | L       | E         | K            | SEEP--         | VK     | Y      | Y        | R         | F     | R         | F       | FP        | SS  | MF  | Q  | ES | R  | A-- | SY | F | S | L | S | K | G | R----- | I | F | A | V | L   | D | Y | 137 |   |   |   |   |   |   |        |     |    |   |   |   |   |   |     |    |   |   |   |   |   |   |   |   |     |     |     |   |   |     |   |   |     |
| trJAK1   | SISPLCHNL       | FA                        | L          | Y           | N          | E          | T        | T         | D                | T          | W           | Y       | P         | P            | N              | H      | E      | F        | K         | I     | T         | D       | E         | T   | S   | I  | K  | H  | Y   | R  | M | R | F | Y | R | N | W      | H | G | T | T | E   | G | E | S   | P | V | W | R | H | C | I      | S   | K  | L | R | G | G | L | S   | P  | Q | K | T | P | E | G | T | P | L   | D   | A   | A | S | L   | D | Y | 158 |
| LatJAK1  | SISPLCHNL       | FA                        | L          | Y           | N          | E          | T        | T         | D                | T          | W           | Y       | P         | P            | N              | H      | E      | F        | K         | I     | T         | D       | E         | T   | S   | I  | K  | H  | Y   | R  | M | R | F | Y | R | N | W      | H | G | T | T | E   | G | E | S   | P | V | W | R | H | C | I      | S   | K  | L | R | G | G | L | S   | P  | Q | K | T | P | E | G | T | P | L   | D   | A   | A | S | L   | D | Y | 158 |
| DanJAK1  | RILP            | CHNL                      | FA         | L           | Y          | E          | S        | D         | L                | A          | P           | N       | H         | V            | E              | K      | I      | T        | D         | E     | T         | S       | I         | K   | H   | Y  | R  | M  | R   | F  | Y | R | N | W | H | G | T      | T | E | G | E | S   | P | V | W   | R | H | C | I | S | K | L      | R   | G  | G | L | S | P | Q | K   | T  | P | E | G | T | P | L | D | A | A   | S   | L   | D | Y | 156 |   |   |     |
| HomJAK1  | RISPLCHNL       | FA                        | L          | Y           | N          | E          | T        | T         | D                | T          | W           | Y       | P         | P            | N              | H      | E      | F        | K         | I     | T         | D       | E         | T   | S   | I  | K  | H  | Y   | R  | M | R | F | Y | R | N | W      | H | G | T | T | E   | G | E | S   | P | V | W | R | H | C | I      | S   | K  | L | R | G | G | L | S   | P  | Q | K | T | P | E | G | T | P | L   | D   | A   | A | S | L   | D | Y | 146 |
| trTYK2   | GITP            | CHNL                      | FA         | L           | Y          | N          | P        | L         | S                | R          | C           | W       | N         | S            | P              | N      | H      | I        | F         | S     | P         | E       | N         | T   | S   | L  | V  | H  | Y   | C  | M | R | F | Y | R | N | W      | H | G | L | N | E   | K | E | P   | T | V | S | R | Y | L | R      | S-- | GT | N | Q | G | S | S | P-- | LT | E | I | T | S | L | E | Y | L | 144 |     |     |   |   |     |   |   |     |
| LatTYK2  | GITP            | CHNL                      | FA         | L           | Y          | N          | P        | L         | S                | R          | C           | W       | N         | S            | P              | N      | H      | I        | F         | S     | P         | E       | N         | T   | S   | L  | V  | H  | Y   | C  | M | R | F | Y | R | N | W      | H | G | L | N | E   | K | E | P   | T | V | S | R | Y | L | R      | S-- | GT | N | Q | G | S | S | P-- | LT | E | I | T | S | L | E | Y | L | 148 |     |     |   |   |     |   |   |     |
| DanTYK2  | GITP            | CHNL                      | FA         | L           | Y          | N          | P        | L         | S                | R          | C           | W       | N         | S            | P              | N      | H      | I        | F         | S     | P         | E       | N         | T   | S   | L  | V  | H  | Y   | C  | M | R | F | Y | R | N | W      | H | G | L | N | E   | K | E | P   | T | V | S | R | Y | L | R      | S-- | GT | N | Q | G | S | S | P-- | LT | E | I | T | S | L | E | Y | L | 145 |     |     |   |   |     |   |   |     |
| HomTYK2  | GITP            | CHNL                      | FA         | L           | Y          | N          | P        | L         | S                | R          | C           | W       | N         | S            | P              | N      | H      | I        | F         | S     | P         | E       | N         | T   | S   | L  | V  | H  | Y   | C  | M | R | F | Y | R | N | W      | H | G | L | N | E   | K | E | P   | T | V | S | R | Y | L | R      | S-- | GT | N | Q | G | S | S | P-- | LT | E | I | T | S | L | E | Y | L | 152 |     |     |   |   |     |   |   |     |
| trJAK2a  | FFQWRSD         | FL                        | D          | G           | W          | V          | Q        | I         | P                | V          | S           | H       | E         | C            | Q              | E----- | EC     | L        | MA        | V     | L         | D       | M         | R   | L   | A  | K  | E  | S   | G  | S | P | V | D | I | Y | N      | D | T | S | Y | K   | S | F | L   | P | R | C | M | Q | S | R      | I   | Q  | E | Y | N | I | L | R   | K  | R | I | R | F | R | F | K | R | F   | 250 |     |   |   |     |   |   |     |
| LatJAK2a | FFQWRSD         | FL                        | D          | G           | W          | V          | Q        | I         | P                | V          | S           | H       | E         | C            | Q              | E----- | EC     | L        | MA        | V     | L         | D       | M         | R   | L   | A  | K  | E  | S   | G  | S | P | V | D | I | Y | N      | D | T | S | Y | K   | S | F | L   | P | R | C | M | Q | S | R      | I   | Q  | E | Y | N | I | L | R   | K  | R | I | R | F | R | F | K | R | F   | 251 |     |   |   |     |   |   |     |
| DanJAK2a | CAQWRSD         | FL                        | D          | G           | W          | V          | Q        | I         | P                | V          | S           | H       | E         | C            | Q              | E----- | EC     | L        | MA        | V     | L         | D       | M         | R   | L   | A  | K  | E  | S   | G  | S | P | V | D | I | Y | N      | D | T | S | Y | K   | S | F | L   | P | K | N | M | R | E | H      | T   | Q  | N | Q | H | L | R | K   | R  | I | R | F | R | F | K | R | F | 214 |     |     |   |   |     |   |   |     |
| HomJAK2  | FAQWRH          | D                         | F          | V           | H          | G          | W        | I         | K                | V          | P           | T       | H         | E            | T              | Q      | E----- | EC       | L         | MA    | V         | L       | D         | M   | R   | L  | A  | K  | E   | S  | G | S | P | V | D | I | Y      | N | D | T | S | Y   | K | S | F   | L | P | K | C | I | R | A      | K   | I  | Q | D | Y | H | I | L   | R  | K | R | I | R | F | R | F | K | R   | F   | 237 |   |   |     |   |   |     |
| trJAK3   | FAQWRH          | D                         | F          | V           | H          | G          | W        | I         | K                | V          | P           | T       | H         | E            | T              | Q      | E----- | EC       | L         | MA    | V         | L       | D         | M   | R   | L  | A  | K  | E   | S  | G | S | P | V | D | I | Y      | N | D | T | S | Y   | K | S | F   | L | P | K | C | I | R | A      | K   | I  | Q | D | Y | H | I | L   | R  | K | R | I | R | F | R | F | K | R   | F   | 226 |   |   |     |   |   |     |
| LatJAK3  | FAQWRH          | D                         | F          | V           | H          | G          | W        | I         | K                | V          | P           | T       | H         | E            | T              | Q      | E----- | EC       | L         | MA    | V         | L       | D         | M   | R   | L  | A  | K  | E   | S  | G | S | P | V | D | I | Y      | N | D | T | S | Y   | K | S | F   | L | P | K | C | I | R | A      | K   | I  | Q | D | Y | H | I | L   | R  | K | R | I | R | F | R | F | K | R   | F   | 226 |   |   |     |   |   |     |
| DanJAK3  | FAQWRH          | D                         | F          | V           | H          | G          | W        | I         | K                | V          | P           | T       | H         | E            | T              | Q      | E----- | EC       | L         | MA    | V         | L       | D         | M   | R   | L  | A  | K  | E   | S  | G | S | P | V | D | I | Y      | N | D | T | S | Y   | K | S | F   | L | P | K | C | I | R | A      | K   | I  | Q | D | Y | H | I | L   | R  | K | R | I | R | F | R | F | K | R   | F   | 222 |   |   |     |   |   |     |
| HomJAK3  | FAQWRH          | D                         | F          | V           | H          | G          | W        | I         | K                | V          | P           | T       | H         | E            | T              | Q      | E----- | EC       | L         | MA    | V         | L       | D         | M   | R   | L  | A  | K  | E   | S  | G | S | P | V | D | I | Y      | N | D | T | S | Y   | K | S | F   | L | P | K | C | I | R | A      | K   | I  | Q | D | Y | H | I | L   | R  | K | R | I | R | F | R | F | K | R   | F   | 221 |   |   |     |   |   |     |
| trJAK1   | FAQWRH          | D                         | F          | V           | H          | G          | W        | I         | K                | V          | P           | T       | H         | E            | T              | Q      | E----- | EC       | L         | MA    | V         | L       | D         | M   | R   | L  | A  | K  | E   | S  | G | S | P | V | D | I | Y      | N | D | T | S | Y   | K | S | F   | L | P | K | C | I | R | A      | K   | I  | Q | D | Y | H | I | L   | R  | K | R | I | R | F | R | F | K | R   | F   | 246 |   |   |     |   |   |     |
| LatJAK1  | FAQWRH          | D                         | F          | V           | H          | G          | W        | I         | K                | V          | P           | T       | H         | E            | T              | Q      | E----- | EC       | L         | MA    | V         | L       | D         | M   | R   | L  | A  | K  | E   | S  | G | S | P | V | D | I | Y      | N | D | T | S | Y   | K | S | F   | L | P | K | C | I | R | A      | K   | I  | Q | D | Y | H | I | L   | R  | K | R | I | R | F | R | F | K | R   | F   | 248 |   |   |     |   |   |     |
| DanJAK1  | FAQWRH          | D                         | F          | V           | H          | G          | W        | I         | K                | V          | P           | T       | H         | E            | T              | Q      | E----- | EC       | L         | MA    | V         | L       | D         | M   | R   | L  | A  | K  | E   | S  | G | S | P | V | D | I | Y      | N | D | T | S | Y   | K | S | F   | L | P | K | C | I | R | A      | K   | I  | Q | D | Y | H | I | L   | R  | K | R | I | R | F | R | F | K | R   | F   | 246 |   |   |     |   |   |     |
| HomJAK1  | FAQWRH          | D                         | F          | V           | H          | G          | W        | I         | K                | V          | P           | T       | H         | E            | T              | Q      | E----- | EC       | L         | MA    | V         | L       | D         | M   | R   | L  | A  | K  | E   | S  | G | S | P | V | D | I | Y      | N | D | T | S | Y   | K | S | F   | L | P | K | C | I | R | A      | K   | I  | Q | D | Y | H | I | L   | R  | K | R | I | R | F | R | F | K | R   | F   | 236 |   |   |     |   |   |     |
| trTYK2   | FAQWRH          | D                         | F          | V           | H          | G          | W        | I         | K                | V          | P           | T       | H         | E            |                |        |        |          |           |       |           |         |           |     |     |    |    |    |     |    |   |   |   |   |   |   |        |   |   |   |   |     |   |   |     |   |   |   |   |   |   |        |     |    |   |   |   |   |   |     |    |   |   |   |   |   |   |   |   |     |     |     |   |   |     |   |   |     |

|         |                                                                                              |     |
|---------|----------------------------------------------------------------------------------------------|-----|
| HomJAK3 | T-----QGEQE-----VLQPFCDFFPFIIVDLSIQAPRVGGPAGEHRLVTVIRTDNQILE                                 | 329 |
| trJAK1  | R-----KKPATMSLVSKKEGK---SKNKLDGKQKNDNRKEAN-EGWVVFCDFFHFIHTHTVIKEAT-----VTIIFKQDDKRM          | 404 |
| LatJAK1 | R-----KKPAATSVISKEGK---SRKNKLDGKQKNDRKKEAN-EGWVVFCDFFHFIHTHTVIKEAM-----VTIIFKQDNKRM          | 406 |
| DanJAK1 | R-----RKPAPNQLILKDKPK---SKIKIGD-KQWNDKMKDS---GWTLESCDFHFIHTHTVIKDCC-----VTIIFKQDNKTM         | 389 |
| HomJAK1 | R-----HKPNVVSVE-KEKNK---LKRKLENKHKHKDEEKNKIREEWNNSYFFPFIHTHTVIESV-----VSINQDNKKME            | 381 |
| trTYK2  | R-----KVSQGKAQANSYLNRNDYLS---KTKQQSSHPKTANTPNK-----LTAFCDFDFPFIHTHTAITGAN-----VCISTQDNCRME   | 388 |
| LatTYK2 | R-----KVSQGKAQANSYLNRDYMYSMRKTKHQSNQPNNGNTPDE-----WTVFCDFDFPFIHTHTAITSGAN-----VCISTLDNHCME   | 395 |
| DanTYK2 | R-----KFSAQRSQSDDYSHS-----QNKETAALNEEED-----WNIFCDFDFPFIHTHTAIQGIN-----VCISTQDNMSMD          | 381 |
| HomTYK2 | WPVEEEVKNKEEGSSGSSSGRN PQAS---LFGKKAKAHKAVGPQADRPREPRLWAYFCDFDFPFIHTHTVLEHC-----VSIHFQDNKCLE | 404 |

|          |                                                                                             |     |
|----------|---------------------------------------------------------------------------------------------|-----|
| trJAK2a  | LEFHSLSHALSFVSLVDGYRYRLVADAHHYLCKEVAPERLLECTQSYHHGVPVSMFETDKLRRSGNHQCLVILRGSPRDYDKYFMSFVVGY | 447 |
| LatJAK2a | LEFHSLSHALSFVSLVDGYRYRLVADAHHYLCKEVAPERLLECTQSYHHGVPVSMFETDKLRRSGNHQCLVILRGSPRDYDKYFMSFVVGY | 448 |
| DanJAK2a | LEFQSLSHALSFVSLIDGYRYRLTDAHHYLCKEVAPERLLEATQINCHGPISTEFASRLRRCCEGQPGVILRGSPKDYDRYFLSMFVEA   | 409 |
| HomJAK2  | IELSSLRREALSFVSLIDGYRYRLTDAHHYLCKEVAPAVLENTQSNCHGPISMDFAVSKLKKAGNQTGLVILRGSPKDFNKYFLTFAVER  | 443 |
| trJAK3   | AMFQGLKHALSFVSLVDGYFRLTIDSSHYFCQDIAPESILEGKKNHCHGPITSEFAVHKLKKSFGKGGTILRGSPKNYDSFLLTVCVQT   | 427 |
| LatJAK3  | AKFQSLKHALSFVSLVDGYFRLTIDSSHYFCQDIAPESILEGKKNHCHGPITSEFAVHKLKKSFGKGGTILRGSPKNYDNFLLTVCVQT   | 427 |
| DanJAK3  | AEFQTLTDAHSFVSLVDGYFRLTIDSTHYFCQDVAPERLLEDTQNYCHGPITSEFAVHKLKKGAGKNMILLRHSPKEADKYFLTVCIQIT  | 422 |
| HomJAK3  | AEFFGLPHALSFVSLVDGYFRLTIDSCHEFFCKEVAPERLLEEVAEQCHGPITLDFAVHKLKTGGSRPGSVILRGSPQDNDSFLLTVCVQN | 419 |
| trJAK1   | MQMAARVHALSFAALVDGYFRLTIDAHHYLSKEVAPASVVHNNNGCHGPICTEYAVHKLRODGNEECAMILRWSTCTDYQYIIITAVVCTE | 494 |
| LatJAK1  | MLMASRPHALSFAALVDGYFRLTIDAHHYLCKEVAPASVVHNNNGCHGPICTEYAVHKLROEGNEECTVILRWSTCTDYFYIIITVTVCTE | 496 |
| DanJAK1  | LDLFYRDAALSFAALVDGYFRLTIDAHHYLCCTDVAPSSVVQNNENGCHGPICTEYAVHKLROEGNEECTVILRWSTCTEYFIIMTVVCIE | 479 |
| HomJAK1  | LKLSHSEHALSFVSLVDGYFRLTIDAHHYLCCTDVAPILVHNTQNGCHGPICTEYAVHKLROEGSEECMSVLRWSTCTDFDNILMTVTCFE | 471 |
| trTYK2   | VQMNSSQARSFISLLDGYRYRLTIDAHHYLCHEVAPERVVLSEANGLHGPMHDDFVILKLKKEAAEDCALVLRWSALDYHRIILAVLNTN  | 478 |
| LatTYK2  | AQMNSSQARSFISLLDGYRYRLTIDAHHYLCHEVAPERVVLSEANGLHGPMHDDFVILKLKKEAAEECALVLRWSALDYHRIILAVLNKN  | 485 |
| DanTYK2  | ISLDSISARSFISLLDGYFRLTIDAHHYLCHEVAPERVVLSEANGLHGPMHDDFVILKLKREVEERG-AALVLRWSALDYHRIILASLSRS | 470 |
| HomTYK2  | LSLPSRAAALSFSVSLVDGYFRLTIDSGHYLCHEVAPERLVMSTRDGIHGPLLEFFVQAKLR--PEDCLLIHWSSTSHPYRLILTVAQRS  | 491 |

### SH2 domain

|          |                                                                                                 |     |
|----------|-------------------------------------------------------------------------------------------------|-----|
| trJAK2a  | -----ETMVDYKHCCIMKTESGEYILSKAKRSFGSLRELLHCYQKEALRTDGYTFOITRCPPSPKDKSNLIVCRNNQGADVPLSPYLQ        | 531 |
| LatJAK2a | -----ETMVDYKHCCIMKTESGEYILSKAKRSFGSLRELLHCYQKEALRTDGYTFOITRCPPSPKDKSNLIVCRNNQGAEVPLSPSLH        | 532 |
| DanJAK2a | -----EGQLELKHCLVLRSLSGEFVLSKARCSFSSISELLARYQKEALRSDTHVFOITRCPPSPKDKSNLIVCRTHQGSEVCAPSSEH        | 493 |
| HomJAK2  | -----ENVIEYKHCLITKNENEEYNLSCTKKNFSSLRDLNLCYQMETVRSNIIIFQFTKCCPPKPKDKSNLIVFRTNGVDSFLLTVCVQLQ     | 527 |
| trJAK3   | -----PLGLDYKDCCLIKNEH--YSLPQVQKSFSSLRKLTSSYYQHTKILLAEVPVMIGCCPPPRPEELTNLIIRNNNTVTGTHGSPTLE      | 509 |
| LatJAK3  | -----PLGLDYKDCCLIKNEH--YSLPQVQKTFSSLRRELTSHYQHTKILLAEVPVMIGHCLPPRPKEFTNLTIIRSSNSVDTCQSSPTPE     | 509 |
| DanJAK3  | -----PLGMDYKDCCLIEKNEK--ESLAGIHNSFINLQDLDFYQLSTVYSDIIPVTIGKCCPPRAKELTNMIIRNSSMTLIPSSPTLQ        | 504 |
| HomJAK3  | -----PLGPDYKGCILRRSPTGTLELLVCLSRPHSSLRELLATCWDGGLHVDGVAVTTSCCIPRPKEKSNLIVVQRGHSPPTSSLVQPQ       | 503 |
| trJAK1   | IDLRESRPVRKYNFOIEVASDG-YRLYCTDTLRLPILRELEHLEHGQSRLTDNLHFQILRCPPQPREVSNLIVVTKD-----RAPVPQ        | 577 |
| LatJAK1  | IDLKESRPVKQYNFOIEVASDG-YRLYCTDTLRLPILRELEHLEHGQSRLTDNLHFQILRCPPQPREVSNLIVVTKD-----RAPAPQ        | 579 |
| DanJAK1  | LDLCESRPVPQYNFOIETS PQG-YRLYCTDTRFRPLKELLEHLQQLLRTDNLRFQILRCPPQPREISNLIIVMTTD-----REBPVPQ       | 562 |
| HomJAK1  | KSEQVQGAQKQYNFOIEVQKGR-YSLHESDRSFPSIGDLMSHLKKQILRTDNLISFMIKKCCQPKPREISNLIIVATK-----KAQEWQ       | 553 |
| trTYK2   | KNES----TQSHKQFRITQYKGSV-ECLEGLDQEFSSVKELTDSLKTFFVLKSGSDNFSIKKCCQFPRQAEISNLIIVMRQGV-----RSVHND  | 560 |
| LatTYK2  | ENGL----TPSHKQFRITQHRGSM-ECLEGLDQEFSSVKELTDSLKTFFVLKSGSDSFTIKKCCQFPRQAEISNLIIVMRKGVG-----RNNNTS | 567 |
| DanTYK2  | KEGE----NPVYKQFRITRONGSL-FHLEGLDQDFSSIKELTSSLKTFFVLKSGSDSFTIKKCOLPKPGELSNLIIVRKGAKE-----SSIKSAS | 552 |
| HomTYK2  | QAPDGMQ-SLRLRKFPITREQDGA-FVLEGLWGRSFPSVRELGAALQGCLIRAGDDCFSLRCCQLPQGETSNLIIVIMRG-----ARASP      | 571 |

|          |                                                                                              |     |
|----------|----------------------------------------------------------------------------------------------|-----|
| trJAK2a  | K--HISQMVFHKIKRKEDLVINSLCGGTFTKIFCG-----VRKELGDYGEIHQIDVVIKILHKAENYSESFEEBAASM               | 602 |
| LatJAK2a | K--HINQMVFHKIQKEDLIINSLCGGTFTKIFCG-----VRKELGDYGEIHQIDVVIKILHKAENYSESFEEBAASM                | 603 |
| DanJAK2a | R--LVNQMVFHKIHRREDLQTTGSLCGGTFTCQVRG-----LRREVGDYGEVHKMEVVMKILDKSHNYTESFEEBAASM              | 564 |
| HomJAK2  | RPTHMNMV FHKIARNEDLIFNESLCGGTFTKIFKG-----VRREVGDYQQLHETEVLKLVLDKAHNYSESFEEBAASM              | 600 |
| trJAK3   | -RNKFSHHCFFNMIKYKDLKWEBSLCGGSTTRIFKG-----YKTDIHD-GEKHVTEVLLKELDVARNCWESFEEBAASL              | 580 |
| LatJAK3  | -RSKFSHHCFFNMIKYEDLTSGBSLCGGSTTRIFKG-----CTDIRD-GEKHLTEVLLKELDVARNCWESFEEBAASL               | 580 |
| DanJAK3  | -RHKPSHHCFFNMIKHEDLIWSBSLCGGSTTRIFRG-----SKIDQRD-GGTHSTEVLLKVLNDANHCWESLFEBAASL              | 575 |
| HomJAK3  | SQYQLSQMVFHKIIPADSLEWHENLHGSGSTTKIFRG-----CRHEVVD-GEARKTEVLLKLVMDAKHNCMESLFEBAASL            | 575 |
| trJAK1   | TPMQBSQLSFHRILKEBIEQEHLGLGTRTNIYSGTLRVK-----SEEEEDAG-YSSFQEVKVVLLKULGSGHDIISLAFFETASM        | 656 |
| LatJAK1  | TPMQBSQLSFHRILKEBIEQEHLGLGTRTNIYSGTLRVK-----SEEEEDAG-YSSFQEVKVVLLKULGSGHDIISLAFFETASM        | 658 |
| DanJAK1  | KKTQVSQLSFDRILKEBIEVQGHGLGRGTRTNIYAGILKPK-----SDDEDDLGGYS--QEVKVVLLKULGSGHDIISLAFFETASM      | 640 |
| HomJAK1  | PVYPMSQLSFDRILKKDLVQGEHLGRGTRTHIYSGTLM DY-----KDDEGTSE---EKKIKVILKVLDPSSHRIISLAFFETASM       | 629 |
| trTYK2   | FSRNMSSQRFHFHVKEKEIVQGBHLGRGTRTNIYSGRYLVQGRGN-----SEDDDEFNNNSDRKGRVVLKLDQSHEDIALAFETASL      | 644 |
| LatTYK2  | LSLNLTLQRFHOKDREIVQGBHLGRGTRTNIYAGRLRVRSRGD-----DDDDCCNNNFSAGKGRVVLKLEQSHEDIALAFETASL        | 651 |
| DanTYK2  | ETPDLSQLSFNPTKDBEITKEGBHLGRGTRTNIYSGWLKIRGSL-----DEDDSNNNHCKTKGRVVLKLEBQSQHEDKALAFETASL      | 636 |
| HomTYK2  | RTLNLSQLSFHRVDQKEITQLSHLCGGTRTNIYVEGRRLRVEGSGDPPEGKMDDEDPLVPGDRGQELRVVLKVLDPSSHRIISLAFFETASL | 661 |

|          |                                                                                             |     |
|----------|---------------------------------------------------------------------------------------------|-----|
| trJAK2a  | MSLSYKHLLLLNYGVVCGDENIMVVEYKGFSGSLDTYLRANKSCVNITWKLEVAQQLAWAMHFLLEDNKLHGVVCAKVLILREEDRKTG   | 692 |
| LatJAK2a | MSLSYKHLLLLNYGVVCGDENIMVVEYKGFSGSLDTYLRANKSCVNITWKLEVAQQLAWAMHFLLEDNKLHGVVCAKVLILREEDRKTG   | 693 |
| DanJAK2a | MSLSYKHLLLLNYGVVCGDENIMVVEYKGFSGSLDTYLRANKSCVNITWKLEVAQQLAWAMHFLLEDNKLHGVVCAKVLILREEDRKTG   | 654 |
| HomJAK2  | MSLSYKHLLLLNYGVVCGDENILVQEFVFKFGSLDTYLRANKSCVNITWKLEVAQQLAWAMHFLLEDNKLHGVVCAKVLILREEDRKTG   | 690 |
| trJAK3   | MSLSYKHLLLLNYGVVCGDENIMVVEYKYGALDLYLR-RGRSVSVSWKLDVAKQLASALNPLEENNIHGNITAKNILLAREGDPSQG     | 669 |
| LatJAK3  | MSLSYKHLLLLNYGVVCGDENIMVVEYKYGALDLYLR-RGRSVSVSWKLDVAKQLASALNPLEENNIHGNITAKNILLAREGDPSQG     | 669 |
| DanJAK3  | MSLSYKHLLLLNYGVVCGDENIMVVEYKYGALDLYLR-RSMCVSVSWKLDVAKQLACALNPLEENNIHGNITAKNILLAREGD---G     | 660 |
| HomJAK3  | MSQVSHRHLLVLLHGVVCAK-DSTMVQEFVHLCAIDMYLRKRGHLPASWKLQVVKQLAYALNYLEDKGLPHGNVSARKVILLAREGAD--G | 662 |
| trJAK1   | MRVSHKHLLVLLHGVVCAKIMVVEYFQLGELDLFMRQQTTPKWKFWAKQLASALSYLEDNKLHGVVCAKVLILAREGLDGLDTE        | 746 |
| LatJAK1  | MRVSHKHLLVLLHGVVCAKIMVVEYFQLGELDLFMRQQTTPKWKFWAKQLASALSYLEDNKLHGVVCAKVLILAREGLDGLDTE        | 748 |
| DanJAK1  | MRVSHKHLLVLLHGVVCAKIMVVEYFQYGLDLFMRQQTTPKWKFWAKQLASALSYLEDNKLHGVVCAKVLILAREGLDGLD-E         | 729 |
| HomJAK1  | IRQVSHKHLLVLLHGVVCAKIMVVEYFQYGLDLFMRQQTTPKWKFWAKQLASALSYLEDNKLHGVVCAKVLILAREGLDGLD-E        | 718 |
| trTYK2   | MSQVSHRHLLVLLHGVVCAKIMVVEYFQYGLDLFMRQQTTPKWKFWAKQLASALSYLEDNKLHGVVCAKVLILAREGLEH-G          | 733 |
| LatTYK2  | MSQVSHRHLLVLLHGVVCAKIMVVEYFQYGLDLFMRQQTTPKWKFWAKQLASALSYLEDNKLHGVVCAKVLILAREGLEH-G          | 740 |
| DanTYK2  | MSQVSHRHLLVLLHGVVCAKIMVVEYFQYGLDLFMRQQTTPKWKFWAKQLASALSYLEDNKLHGVVCAKVLILAREGLEH-G          | 725 |
| HomTYK2  | MSQVSHRHLLVLLHGVVCAKIMVVEYFQYGLDLFMRQQTTPKWKFWAKQLASALSYLEDNKLHGVVCAKVLILAREGLAE-G          | 750 |

|          |                                                                                         |     |
|----------|-----------------------------------------------------------------------------------------|-----|
| trJAK2a  | SLPFIKLLDPGISITVLPREVLVERIPWVPEPIENPQ-NLSLAIDNWSFGTTLWEICSGGDKPLSTLDCSKKNLFYDRHQIPAKWTE | 781 |
| LatJAK2a | SLPFIKLLDPGISITVLPREVLVERIPWVPEPIENPQ-NLSLAIDNWSFGTTLWEICSGGDKPLSTLDCSKKNLFYDRHQIPAKWTE | 782 |
| DanJAK2a | TPPFIKLLDPGISITVLPREVLVERIPWVPEPIENPQ-NLSLAIDNWSFGTTLWEICSGGDKPLSTLDCSKKNLFYDRHQIPAKWTE | 743 |
| HomJAK2  | NPPFIKLLDPGISITVLPKDLQERIPWVPEPIENPQ-NLSLAIDNWSFGTTLWEICSGGDKPLSTLDCSKKNLFYDRHQIPAKWTE  | 779 |
| trJAK3   | SSPFIKLLDPGISITVLPREVLVERIPWVPEPIENPQ-NLSLAIDNWSFGTTLWEICSGGDKPLSTLDCSKKNLFYDRHQIPAKWTE | 758 |

|         |                                                                                                                                                                                                            |     |
|---------|------------------------------------------------------------------------------------------------------------------------------------------------------------------------------------------------------------|-----|
| LatJAK3 | SSPFVKLDPGSI <del>SL</del> AMIGQDVLDRIPWVAPEVLEFPD-NITLEDQWWSFGATVMEIFN <del>NN</del> NA <del>L</del> RGWVLERRRFY <del>YS</del> FOQ <del>Q</del> PPSQWTE                                                   | 758 |
| DanJAK3 | -SPPIKLD <del>DP</del> GVMS <del>SL</del> LGQDVLDRI <del>PW</del> VAPEVLD <del>T</del> -L-EIELEDQWWSFGTTLWEIFNGEAF <del>L</del> QGLDMCKLCFY <del>IN</del> FSN <del>L</del> PTLEWTE                         | 747 |
| HomJAK3 | SPPFIKLSDPGVSPAVLSLEMLTDRI <del>PW</del> VAPECLREAQ-TLSLEAD <del>K</del> MGFGATVWEVFSGVTMP <del>S</del> ALDPAKKLQFYEDRQQLPAFKWTE                                                                           | 751 |
| trJAK1  | GGPFIKLDPGIDITVITREECV <del>HR</del> IPWIAPEV <del>K</del> SLT-A <del>S</del> IAADQWWSFGTTLWEICYD <del>EV</del> FLKEKKL <del>TE</del> KERFY <del>TE</del> CO <del>LA</del> TATDCRE                         | 835 |
| LatJAK1 | GGPFIKLDPGIDITVITREECV <del>HR</del> IPWIAPEV <del>K</del> SLT-A <del>S</del> IAADQWWSFGTTLWEICYD <del>EV</del> FLKEKKL <del>TE</del> KERFY <del>TE</del> CO <del>LA</del> TATDCRE                         | 837 |
| DanJAK1 | GGPFIKLDPGIDITVITREECV <del>HR</del> IPWIAPEV <del>K</del> SDTA-N <del>S</del> IAADQWWSFGTTLWEICYN <del>GE</del> IFL <del>K</del> DKKL <del>TE</del> KERFYA <del>Q</del> CC <del>LA</del> TATDCDE          | 818 |
| HomJAK1 | CGPPIKLDSPGIPITVLSRQCI <del>ER</del> IPWIAPEQVEDSK-NLCVAA <del>E</del> KKWSFGTTLWEICYNGE <del>IF</del> L <del>K</del> DKTL <del>IE</del> KERFY <del>YS</del> SR <del>CR</del> PVT <del>SC</del> KE         | 807 |
| trTYK2  | TTPFIKLDPGIAGVLSREERLERIPWIAPEV <del>D</del> SGA-P <del>G</del> SAADQWWSFGVTLL <del>IC</del> NN <del>Q</del> DV <del>M</del> SGSALSKKERFY <del>Q</del> KSR <del>IP</del> ES <del>SM</del> SE               | 822 |
| LatTYK2 | TTPFIKLDPGIAGVLSREERLERIPWIAPEV <del>D</del> SGT-LSDTKADQWWSFGVTLL <del>IC</del> NN <del>Q</del> DV <del>L</del> SSSALAKKERFY <del>Q</del> KGR <del>LA</del> ES <del>SS</del> QE                           | 829 |
| DanTYK2 | TSPFVKLDPGSI <del>SL</del> SA <del>S</del> QGERVERIPWIAPEV <del>AD</del> GT-R <del>G</del> SAADQWWSFGATLL <del>IC</del> NN <del>Q</del> DLHVSNTSLSEKQRFY <del>Q</del> TSR <del>LA</del> V <del>SS</del> QE | 814 |
| HomTYK2 | TSPFIKLDSPGVLGAL <del>S</del> REERVERIPWIAPECLPGGANS <del>L</del> STAM <del>K</del> WGFGATLL <del>IC</del> CFDGEAP <del>L</del> QSRSPSEKEH <del>FY</del> QR <del>HR</del> LPE <del>SC</del> PC             | 840 |

|          |                                                                                                                                                                                                                                                    |     |
|----------|----------------------------------------------------------------------------------------------------------------------------------------------------------------------------------------------------------------------------------------------------|-----|
| trJAK2a  | LANL <del>IN</del> SCMDY <del>EL</del> SHR <del>IS</del> FR <del>AI</del> IR <del>DL</del> NSITFTPDYELLVESDMVP-NRTRGFGFPWASE-SQEPAC <del>FE</del> ERH <del>LI</del> FL <del>K</del> QL <del>KG</del> NFGSV <del>EM</del> CRY                       | 869 |
| LatJAK2a | LANL <del>IN</del> SCMDY <del>EL</del> SHR <del>IS</del> FR <del>AI</del> IR <del>DL</del> NSITFTPDYELLVESDMVP-NRTRGFGFPWASE-SQEPAC <del>FE</del> ERH <del>LI</del> FL <del>K</del> QL <del>KG</del> NFGSV <del>EM</del> CRY                       | 870 |
| DanJAK2a | LASV <del>IN</del> SCMDY <del>EL</del> SHR <del>IS</del> FR <del>AI</del> IR <del>DL</del> NSITFTPDYELLVESDTVP-SRHRGPGLAGAFE-SQEP <del>TC</del> Q <del>FA</del> ERH <del>LI</del> FL <del>QL</del> L <del>KG</del> NFGSV <del>EM</del> CRY         | 831 |
| HomJAK2  | LANL <del>IN</del> SCMDY <del>ED</del> DF <del>IS</del> FR <del>AI</del> IR <del>DL</del> NSITFTPDYELLTENDMPLPNMRIGALGFGS <del>GA</del> FE-DRDPT <del>Q</del> FEERH <del>LI</del> FL <del>QL</del> L <del>KG</del> NFGSV <del>EM</del> CRY         | 868 |
| trJAK3   | LADL <del>IS</del> QCMDYQA <del>AF</del> FR <del>SC</del> SIIR <del>QL</del> NSITSDYVILHATBP-VTQSP-VWRALS <del>PQ</del> HDQT--LFEERH <del>LI</del> YIT <del>PL</del> L <del>KG</del> NFGSV <del>EM</del> CRY                                       | 843 |
| LatJAK3  | LADL <del>IS</del> QCMDYQA <del>AF</del> FR <del>SC</del> SIIR <del>QL</del> NSITSDYVILHATBP-VTQSP-VWRALS <del>PQ</del> HDQT--LFEERH <del>LI</del> YIT <del>PL</del> L <del>KG</del> NFGSV <del>EM</del> CRY                                       | 843 |
| DanJAK3  | LAE <del>L</del> ISHCMQY <del>Q</del> EL <del>R</del> SC <del>SI</del> IR <del>QL</del> NSITSDY <del>E</del> ILHATDT--LPESNGFWKKLNIFKKQ <del>Q</del> EDVFEER <del>Y</del> LAF <del>IS</del> V <del>L</del> L <del>KG</del> NFGSV <del>EM</del> CRY | 835 |
| HomJAK3  | LALL <del>IQ</del> CCMAYE <del>EV</del> Q <del>R</del> ES <del>FR</del> AI <del>IR</del> DLNSISSDYELLSDPTPGALAPRDGLWNGAQLYACQDPTIFEERH <del>LI</del> YIT <del>SL</del> L <del>KG</del> NFGSV <del>EM</del> CRY                                     | 841 |
| trJAK1   | LAE <del>L</del> MTDCMSY <del>Q</del> KKR <del>FF</del> RAI <del>VR</del> DI <del>VM</del> EE-----TNPSIQPQ--PTPEVDPTVFEKRL <del>AK</del> IREL <del>EG</del> HFGK <del>VL</del> CRY                                                                 | 908 |
| LatJAK1  | LAE <del>L</del> MTCHMSY <del>Q</del> KKR <del>FF</del> RAI <del>VR</del> DI <del>VM</del> EE-----KNPSIKPQ--PTPEVDPTVFEKRL <del>AK</del> IREL <del>EG</del> HFGK <del>VL</del> CRY                                                                 | 910 |
| DanJAK1  | LAK <del>L</del> NIH <del>CM</del> TYD <del>R</del> QRL <del>FF</del> RAI <del>VR</del> DI <del>VM</del> EK-----QNPSIQPV--PMLEVDPTVFEKRL <del>AK</del> IREL <del>EG</del> HFGK <del>VL</del> CRY                                                   | 891 |
| HomJAK1  | LADL <del>MT</del> RCMNY <del>DF</del> NQ <del>RF</del> FR <del>AI</del> MR <del>DI</del> NKEE-----QNPDIVSEKKPATEVDPTHEKRL <del>AK</del> IREL <del>EG</del> HFGK <del>VL</del> CRY                                                                 | 882 |
| trTYK2   | LAR <del>F</del> ISMCLTYE <del>IV</del> ER <del>IS</del> FR <del>AI</del> VR <del>DI</del> VMK-----KDPDIS-PSETLPD <del>TD</del> SSV <del>EH</del> KRYL <del>AK</del> IREL <del>EG</del> HFGK <del>VL</del> Y <del>YL</del> H                       | 896 |
| LatTYK2  | LAS <del>F</del> ISMCLTYE <del>IV</del> ER <del>IS</del> FR <del>AI</del> VR <del>DI</del> VMK-----IDPAIS-PGETLPDSDPSV <del>EH</del> KRYL <del>AK</del> IREL <del>EG</del> HFGK <del>VL</del> Y <del>YL</del> H                                    | 902 |
| DanTYK2  | LAS <del>F</del> ISMCLTYDAA <del>AR</del> ISFR <del>AI</del> VR <del>DI</del> VMTEQI-----KNPDISSECESLPDKDPSEV <del>Y</del> KRYL <del>AK</del> IREL <del>EG</del> HFGK <del>VL</del> Y <del>YL</del> H                                              | 889 |
| HomTYK2  | LAT <del>IT</del> SCQITYE <del>IV</del> ER <del>IS</del> FR <del>AI</del> MR <del>DI</del> TRIQPH-----NLADVLTVNPDSPASDPTV <del>EH</del> KRYL <del>AK</del> IREL <del>EG</del> HFGK <del>VL</del> Y <del>YL</del> H                                 | 916 |

|          |                                                                                                                                                                                                                                                                          |      |
|----------|--------------------------------------------------------------------------------------------------------------------------------------------------------------------------------------------------------------------------------------------------------------------------|------|
| trJAK2a  | DPLQDSTG <del>IV</del> AVKKLQ <del>H</del> STA--EHLRDFE <del>IE</del> IEL <del>SL</del> H <del>HE</del> NI <del>IV</del> YK <del>GC</del> YSAGRRN <del>RL</del> IMEY <del>YP</del> GL <del>AD</del> Y <del>IL</del> EH <del>D</del> H <del>DF</del> SK <del>IL</del> LHY | 957  |
| LatJAK2a | DPLQDSTG <del>IV</del> AVKKLQ <del>H</del> STA--EHLRDFE <del>IE</del> IEL <del>SL</del> H <del>HE</del> NI <del>IV</del> YK <del>GC</del> YSAGRRN <del>RL</del> IMEY <del>YP</del> GL <del>AD</del> Y <del>IL</del> EH <del>D</del> H <del>DF</del> SK <del>IL</del> LHY | 958  |
| DanJAK2a | DPLQDNTG <del>IV</del> AVKKLQ <del>H</del> STA--EHLRDFE <del>IE</del> IEL <del>SL</del> H <del>HE</del> NI <del>IV</del> YK <del>GC</del> YSAGRRN <del>RL</del> IMEY <del>YP</del> GL <del>AD</del> Y <del>IL</del> EH <del>D</del> H <del>DF</del> SK <del>IL</del> LHY | 919  |
| HomJAK2  | DPLQDNTG <del>IV</del> AVKKLQ <del>H</del> STE--EHLRDFE <del>IE</del> IEL <del>SL</del> H <del>HE</del> NI <del>IV</del> YK <del>GC</del> YSAGRRN <del>RL</del> IMEY <del>YP</del> GL <del>AD</del> Y <del>IL</del> EH <del>D</del> H <del>DF</del> SK <del>IL</del> LHY | 956  |
| trJAK3   | DPLGNTG <del>HL</del> AVKKLQPNKQ--STQEDFQ <del>KE</del> VNTLSVLHCDYIVKYRGV <del>GC</del> YSMGR <del>LS</del> MSLVMEY <del>YP</del> GL <del>IG</del> LYLESN <del>HN</del> VNTRRMLLF                                                                                       | 931  |
| LatJAK3  | DPLGNTG <del>HL</del> AVKKLQPNKQ--STQEDFQ <del>KE</del> VNTLSVLHCDYIVKYRGV <del>GC</del> YSMGR <del>LS</del> MSLVMEY <del>YP</del> GL <del>IG</del> LYLESN <del>HN</del> VNTRRMLLF                                                                                       | 931  |
| DanJAK3  | DPWGDNTG <del>HL</del> AVKKLQSNKQ--ATMADFQ <del>KE</del> IEITLSLHCDYIVKYK <del>GC</del> YSTGR <del>LS</del> TKLVMEY <del>YP</del> GL <del>IG</del> LYME <del>TH</del> HN <del>VN</del> GRKL <del>LL</del> F                                                              | 923  |
| HomJAK3  | DPLGNTG <del>HL</del> AVKKLQ <del>H</del> SGP--DQQRDFQ <del>KE</del> IEITLSLHSDYIVKYRGV <del>GC</del> YSMGR <del>LS</del> MSLVMEY <del>YP</del> GL <del>IG</del> LYLESN <del>HN</del> VNTRRMLLF                                                                          | 929  |
| trJAK1   | DPRGDRTG <del>HL</del> AVKKLQPNKQ--EEOQNNLSSEID <del>IL</del> ALY <del>HE</del> NI <del>IV</del> YK <del>GC</del> Q <del>BE</del> GGQ <del>AI</del> KLIMEY <del>YP</del> GL <del>IG</del> LYLESN <del>HN</del> VNTRRMLLF                                                 | 997  |
| LatJAK1  | DPRGDRTG <del>HL</del> AVKKLQPNKQ--EEOQNNLSSEID <del>IL</del> ALY <del>HE</del> NI <del>IV</del> YK <del>GC</del> Q <del>BE</del> GGQ <del>AI</del> KLIMEY <del>YP</del> GL <del>IG</del> LYLESN <del>HN</del> VNTRRMLLF                                                 | 999  |
| DanJAK1  | DPRGDRTG <del>HL</del> AVKKLQPNKQ--EEOQNNLSSEID <del>IL</del> ALY <del>HE</del> NI <del>IV</del> YK <del>GC</del> Q <del>BE</del> GGQ <del>AI</del> KLIMEY <del>YP</del> GL <del>IG</del> LYLESN <del>HN</del> VNTRRMLLF                                                 | 980  |
| HomJAK1  | DPE <del>L</del> INTG <del>Q</del> AVVKKLQPNKQ--GNHIADL <del>KE</del> IEITLSLHSDYIVKYK <del>GC</del> CTE <del>EG</del> NG <del>CI</del> KLIMEY <del>YP</del> GL <del>IG</del> LYLESN <del>HN</del> VNTRRMLLF                                                             | 970  |
| trTYK2   | DPSNDGTG <del>HL</del> AVVKKLQ <del>EN</del> --GYVPDGM <del>KE</del> IEITLSLHSDYIVKYK <del>GC</del> CTE <del>EG</del> NG <del>CI</del> KLIMEY <del>YP</del> GL <del>IG</del> LYLESN <del>HN</del> VNTRRMLLF                                                              | 982  |
| LatTYK2  | DPANDGTG <del>HL</del> AVVKKLQ <del>EN</del> --GHVPDGM <del>KE</del> IEITLSLHSDYIVKYK <del>GC</del> CTE <del>EG</del> NG <del>CI</del> KLIMEY <del>YP</del> GL <del>IG</del> LYLESN <del>HN</del> VNTRRMLLF                                                              | 988  |
| DanTYK2  | DPHNDGTG <del>HL</del> AVVKKLQ <del>EN</del> --GHVPDGM <del>KE</del> IEITLSLHSDYIVKYK <del>GC</del> CTE <del>EG</del> NG <del>CI</del> KLIMEY <del>YP</del> GL <del>IG</del> LYLESN <del>HN</del> VNTRRMLLF                                                              | 977  |
| HomTYK2  | DPTNDGTG <del>HL</del> AVVKKLQ <del>AD</del> CG--PQHRSGW <del>KE</del> IEITLSLHSDYIVKYK <del>GC</del> CTE <del>EG</del> NG <del>CI</del> KLIMEY <del>YP</del> GL <del>IG</del> LYLESN <del>HN</del> VNTRRMLLF                                                            | 1003 |

|          |                                                                                                                                                                                                                                                                                                      |      |
|----------|------------------------------------------------------------------------------------------------------------------------------------------------------------------------------------------------------------------------------------------------------------------------------------------------------|------|
| trJAK2a  | ASQICKGMDYLG <del>IK</del> RI <del>HR</del> D <del>LA</del> TRN <del>IL</del> VESEM <del>RV</del> KI <del>ED</del> FGL <del>AK</del> VL <del>Q</del> DK <del>KE</del> YY <del>IV</del> REP <del>GE</del> SP <del>FW</del> YAE <del>SE</del> TES <del>IF</del> SVASDVWSF <del>FW</del> VLYE           | 1047 |
| LatJAK2a | ASQICKGMDYLG <del>IK</del> RI <del>HR</del> D <del>LA</del> TRN <del>IL</del> VESEM <del>RV</del> KI <del>ED</del> FGL <del>AK</del> VL <del>Q</del> DK <del>KE</del> YY <del>IV</del> REP <del>GE</del> SP <del>FW</del> YAE <del>SE</del> TES <del>IF</del> SVASDVWSF <del>FW</del> VLYE           | 1048 |
| DanJAK2a | ASQICKGMDYLG <del>IK</del> RI <del>HR</del> D <del>LA</del> TRN <del>IL</del> VESEM <del>RV</del> KI <del>ED</del> FGL <del>AK</del> VL <del>Q</del> DK <del>KE</del> YY <del>IV</del> REP <del>GE</del> SP <del>FW</del> YAE <del>SE</del> TES <del>IF</del> SVASDVWSF <del>FW</del> VLYE           | 1009 |
| HomJAK2  | TSQICKGMEYLG <del>IK</del> RI <del>HR</del> D <del>LA</del> TRN <del>IL</del> VEN <del>EV</del> KI <del>ED</del> FGL <del>AK</del> VL <del>Q</del> DK <del>KE</del> YY <del>IV</del> REP <del>GE</del> SP <del>FW</del> YAE <del>SE</del> TES <del>IF</del> SVASDVWSF <del>FW</del> VLYE             | 1046 |
| trJAK3   | ASQICKGMEYLG <del>IK</del> RI <del>HR</del> D <del>LA</del> TRN <del>IL</del> VEN <del>EV</del> KI <del>ED</del> FGL <del>AK</del> VL <del>Q</del> DK <del>KE</del> YY <del>IV</del> REP <del>GE</del> SP <del>FW</del> YAE <del>SE</del> TES <del>IF</del> SVASDVWSF <del>FW</del> VLYE             | 1021 |
| LatJAK3  | ASQICKGMEYLG <del>IK</del> RI <del>HR</del> D <del>LA</del> TRN <del>IL</del> VEN <del>EV</del> KI <del>ED</del> FGL <del>AK</del> VL <del>Q</del> DK <del>KE</del> YY <del>IV</del> REP <del>GE</del> SP <del>FW</del> YAE <del>SE</del> TES <del>IF</del> SVASDVWSF <del>FW</del> VLYE             | 1021 |
| DanJAK3  | ASQICKGMEYLG <del>IK</del> RI <del>HR</del> D <del>LA</del> TRN <del>IL</del> VEN <del>EV</del> KI <del>ED</del> FGL <del>AK</del> VL <del>Q</del> DK <del>KE</del> YY <del>IV</del> REP <del>GE</del> SP <del>FW</del> YAE <del>SE</del> TES <del>IF</del> SVASDVWSF <del>FW</del> VLYE             | 1013 |
| HomJAK3  | SSQICKGMEYLG <del>IK</del> RI <del>HR</del> D <del>LA</del> TRN <del>IL</del> VEN <del>EV</del> KI <del>ED</del> FGL <del>AK</del> VL <del>Q</del> DK <del>KE</del> YY <del>IV</del> REP <del>GE</del> SP <del>FW</del> YAE <del>SE</del> TES <del>IF</del> SVASDVWSF <del>FW</del> VLYE             | 1019 |
| trJAK1   | SLQICKGMEYLG <del>IK</del> RI <del>HR</del> D <del>LA</del> TRN <del>IL</del> VEN <del>EV</del> KI <del>ED</del> FGL <del>AK</del> VL <del>Q</del> DK <del>KE</del> YY <del>IV</del> REP <del>GE</del> SP <del>FW</del> YAE <del>SE</del> TES <del>IF</del> SVASDVWSF <del>FW</del> VLYE             | 1087 |
| LatJAK1  | SIQICKGMEYLG <del>IK</del> RI <del>HR</del> D <del>LA</del> TRN <del>IL</del> VEN <del>EV</del> KI <del>ED</del> FGL <del>AK</del> VL <del>Q</del> DK <del>KE</del> YY <del>IV</del> REP <del>GE</del> SP <del>FW</del> YAE <del>SE</del> TES <del>IF</del> SVASDVWSF <del>FW</del> VLYE             | 1089 |
| DanJAK1  | SVQICKGMEYLG <del>IK</del> RI <del>HR</del> D <del>LA</del> TRN <del>IL</del> VEN <del>EV</del> KI <del>ED</del> FGL <del>AK</del> VL <del>Q</del> DK <del>KE</del> YY <del>IV</del> REP <del>GE</del> SP <del>FW</del> YAE <del>SE</del> TES <del>IF</del> SVASDVWSF <del>FW</del> VLYE             | 1070 |
| HomJAK1  | AVQICKGMEYLG <del>IK</del> RI <del>HR</del> D <del>LA</del> TRN <del>IL</del> VEN <del>EV</del> KI <del>ED</del> FGL <del>AK</del> VL <del>Q</del> DK <del>KE</del> YY <del>IV</del> REP <del>GE</del> SP <del>FW</del> YAE <del>SE</del> TES <del>IF</del> SVASDVWSF <del>FW</del> VLYE             | 1060 |
| trTYK2   | AQQICKGMEYLG <del>IK</del> RI <del>HR</del> D <del>LA</del> TRN <del>IL</del> VEN <del>EV</del> KI <del>ED</del> FGL <del>AK</del> VL <del>Q</del> DK <del>KE</del> YY <del>IV</del> REP <del>GE</del> SP <del>FW</del> YAE <del>SE</del> TES <del>IF</del> SVASDVWSF <del>FW</del> VLYE             | 1072 |
| LatTYK2  | AQQICKGMEYLG <del>IK</del> RI <del>HR</del> D <del>LA</del> TRN <del>IL</del> VEN <del>EV</del> KI <del>ED</del> FGL <del>AK</del> VL <del>Q</del> DK <del>KE</del> YY <del>IV</del> REP <del>GE</del> SP <del>FW</del> YAE <del>SE</del> TES <del>IF</del> SVASDVWSF <del>FW</del> VLYE             | 1078 |
| DanTYK2  | AQQICLGM <del>Y</del> LG <del>IK</del> RI <del>HR</del> D <del>LA</del> TRN <del>IL</del> VEN <del>EV</del> KI <del>ED</del> FGL <del>AK</del> VL <del>Q</del> DK <del>KE</del> YY <del>IV</del> REP <del>GE</del> SP <del>FW</del> YAE <del>SE</del> TES <del>IF</del> SVASDVWSF <del>FW</del> VLYE | 1067 |
| HomTYK2  | AQQICGM <del>Y</del> LG <del>IK</del> RI <del>HR</del> D <del>LA</del> TRN <del>IL</del> VEN <del>EV</del> KI <del>ED</del> FGL <del>AK</del> VL <del>Q</del> DK <del>KE</del> YY <del>IV</del> REP <del>GE</del> SP <del>FW</del> YAE <del>SE</del> TES <del>IF</del> SVASDVWSF <del>FW</del> VLYE  | 1093 |

|          |                                                                                                                                                                                                                                                                                                                                                          |      |
|----------|----------------------------------------------------------------------------------------------------------------------------------------------------------------------------------------------------------------------------------------------------------------------------------------------------------------------------------------------------------|------|
| trJAK2a  | LYTYSKNCSP <del>PP</del> V <del>FD</del> K <del>M</del> NEKQ <del>Q</del> MI <del>V</del> YHL <del>DL</del> LKQGYRL <del>AD</del> PN <del>CG</del> KEI <del>HK</del> IMTEC <del>W</del> SSD <del>PK</del> LR <del>PT</del> E <del>KT</del> L <del>I</del> HS <del>ET</del> VRDSKDG----                                                                   | 1133 |
| LatJAK2a | LFTYSKNCSP <del>PP</del> V <del>FD</del> K <del>M</del> NEKQ <del>Q</del> MI <del>V</del> YHL <del>DL</del> LKQGYRL <del>AD</del> PN <del>CG</del> KEI <del>HK</del> IMTEC <del>W</del> SSD <del>PK</del> LR <del>PT</del> E <del>KT</del> L <del>I</del> HS <del>ET</del> VRDIKDG----                                                                   | 1134 |
| DanJAK2a | LFTYSEKSP <del>PP</del> V <del>FD</del> K <del>M</del> NEKQ <del>Q</del> MI <del>V</del> YHL <del>DL</del> LKRN <del>Y</del> RL <del>AD</del> PG <del>CG</del> AEI <del>HA</del> LMKQ <del>CA</del> EP <del>AD</del> RL <del>FR</del> D <del>LA</del> RT <del>ED</del> I <del>Q</del> DSQSG----                                                          | 1095 |
| HomJAK2  | LFTYIEKSP <del>PP</del> V <del>FD</del> K <del>M</del> NEKQ <del>Q</del> MI <del>V</del> YHL <del>DL</del> LKNN <del>GR</del> L <del>AD</del> PG <del>CG</del> DEI <del>Y</del> IMTEC <del>W</del> NN <del>N</del> V <del>N</del> Q <del>RP</del> FR <del>D</del> LALR <del>DQ</del> VRDNMAG----                                                         | 1132 |
| trJAK3   | LFSY <del>CM</del> MNCN <del>PK</del> RL <del>Y</del> Q <del>EI</del> HN <del>VO</del> PSISM <del>HL</del> AN <del>IL</del> KT <del>N</del> W <del>RL</del> SAP <del>PH</del> CP <del>PK</del> V <del>Y</del> SL <del>M</del> QC <del>WA</del> YN <del>FD</del> ER <del>PC</del> SS <del>LN</del> Q <del>EI</del> IMQDDR----                             | 1106 |
| LatJAK3  | LFSY <del>CM</del> MNCN <del>PK</del> RL <del>Y</del> Q <del>EI</del> HN <del>VO</del> PSISM <del>HL</del> AN <del>IL</del> KT <del>N</del> W <del>RL</del> SAP <del>PH</del> CP <del>PK</del> V <del>Y</del> SL <del>M</del> QC <del>WA</del> YN <del>FD</del> ER <del>PC</del> SS <del>LN</del> Q <del>EI</del> IMQDDR----                             | 1106 |
| DanJAK3  | LFSY <del>CD</del> ISQNP <del>KL</del> C <del>Q</del> KI <del>RY</del> VH <del>SP</del> SM <del>AI</del> HL <del>TL</del> KN <del>N</del> W <del>RL</del> SAP <del>AC</del> CL <del>LK</del> V <del>Y</del> SL <del>M</del> QC <del>WE</del> FN <del>SE</del> NR <del>PS</del> SS <del>LD</del> L <del>EN</del> SLDER----                                | 1098 |
| HomJAK3  | LFTY <del>CD</del> KSC <del>PS</del> AE <del>FR</del> MM <del>CC</del> ERD <del>V</del> PAL <del>CR</del> -L <del>LE</del> L <del>EG</del> QRL <del>AP</del> PAC <del>AE</del> V <del>HL</del> ML <del>K</del> W <del>AP</del> SP <del>QD</del> RE <del>PS</del> AL <del>GP</del> Q <del>DM</del> WSGSRGCETH                                             | 1108 |
| trJAK1   | LITY <del>CD</del> SSK <del>SP</del> MTL <del>FL</del> SM <del>IG</del> -RTH <del>Q</del> MT <del>IR</del> L <del>K</del> VL <del>Q</del> EG <del>RL</del> R <del>EP</del> SP <del>CE</del> PV <del>Y</del> EL <del>MR</del> K <del>RC</del> WE <del>QL</del> PERRI <del>EF</del> KRL <del>IEE</del> T <del>N</del> V <del>Q</del> QLQ <del>P</del> QNSF | 1176 |
| LatJAK1  | LITY <del>CD</del> SSK <del>SP</del> MTL <del>FL</del> SM <del>IG</del> -RTH <del>Q</del> MT <del>IR</del> L <del>K</del> VL <del>Q</del> EG <del>RL</del> R <del>EP</del> SP <del>CE</del> PV <del>Y</del> EL <del>MR</del> K <del>RC</del> WE <del>QL</del> PERRI <del>EF</del> KRL <del>IEE</del> T <del>N</del> V <del>Q</del> QLQ <del>P</del> QNSF | 1177 |
| DanJAK1  | LLTY <del>CD</del> ASC <del>SP</del> MSV <del>FL</del> K <del>LI</del> E-PTH <del>Q</del> MT <del>VR</del> L <del>K</del> VL <del>Q</del> EG <del>RL</del> R <del>EP</del> SP <del>CE</del> PV <del>Y</del> EL <del>MR</del> K <del>RC</del> WE <del>QL</del> PERRI <del>EF</del> KRL <del>IEE</del> T <del>N</del> V <del>Q</del> QLQ <del>P</del> QNSF | 1153 |
| HomJAK1  | LLTY <del>CD</del> SS <del>SP</del> ML <del>FL</del> K <del>LI</del> E-PTH <del>Q</del> MT <del>VR</del> L <del>K</del> VL <del>Q</del> EG <del>RL</del> R <del>EP</del> SP <del>CE</del> PV <del>Y</del> EL <del>MR</del> K <del>RC</del> WE <del>QL</del> PERRI <del>EF</del> KRL <del>IEE</del> T <del>N</del> V <del>Q</del> QLQ <del>P</del> QNSF   | 1141 |
| trTYK2   | ILTR <del>CD</del> QRQ <del>SP</del> PL <del>FL</del> SEM <del>MD</del> -EPR <del>Q</del> MT <del>VM</del> V <del>L</del> K <del>LE</del> K <del>QL</del> RL <del>CP</del> DK <del>CH</del> EV <del>K</del> ML <del>ME</del> QC <del>WA</del> SE <del>PG</del> QR <del>PE</del> FT <del>SL</del> IER <del>EA</del> IRRSYD <del>W</del> QSGI              | 1161 |
| LatTYK2  | ILTR <del>CD</del> HRQ <del>SP</del> PP <del>VK</del> SEM <del>MD</del> -ATO <del>Q</del> MT <del>VM</del> V <del>L</del> K <del>LE</del> K <del>QL</del> RL <del>CP</del> DK <del>CH</del> EV <del>K</del> ML <del>ME</del> QC <del>WA</del> AD <del>PA</del> QR <del>PS</del> HG <del>PL</del> IEK <del>EA</del> IRRTYD <del>W</del> QSGI              | 1167 |
| DanTYK2  | ILTN <del>CS</del> SHRL <del>SP</del> SK <del>SD</del> MM <del>CG</del> -TVH <del>Q</del> MT <del>VM</del> V <del>L</del> K <del>LE</del> K <del>QL</del> RL <del>CP</del> DK <del>CH</del> EV <del>K</del> ML <del>ME</del> QC <del>WA</del> FN <del>ED</del> QR <del>PS</del> FL <del>SA</del> ES <del>EA</del> IRG <del>PY</del> K <del>Q</del> PSL   | 1156 |
| HomTYK2  | ILTH <del>CS</del> SSQ <del>SP</del> PK <del>FL</del> EL <del>IE</del> -IAQ <del>Q</del> MT <del>VR</del> L <del>K</del> VL <del>Q</del> EG <del>RL</del> R <del>EP</del> SP <del>CE</del> PV <del>Y</del> EL <del>MR</del> K <del>RC</del> WE <del>QL</del> PERRI <del>EF</del> KRL <del>IEE</del> T <del>N</del> V <del>Q</del> QLQ <del>P</del> QNSF  | 1182 |

|          |       |   |
|----------|-------|---|
| trJAK2a  | ----- | - |
| LatJAK2a | ----- | - |
| DanJAK2a | ----- | - |

|         |                 |      |
|---------|-----------------|------|
| HomJAK2 | -----           | -    |
| trJAK3  | ---ENPKG-----   | 1111 |
| LatJAK3 | ---ENLKG-----   | 1111 |
| DanJAK3 | ---EGCKG-----   | 1103 |
| HomJAK3 | AFTAHPEGKHSLSFS | 1124 |
| trJAK1  | -----           | -    |
| LatJAK1 | -----           | -    |
| DanJAK1 | -----           | -    |
| HomJAK1 | -----           | -    |
| trTYK2  | NFSLAQIC-----   | 1169 |
| LatTYK2 | NFSLAQIC-----   | 1175 |
| DanTYK2 | QLAQLNHR-----   | 1164 |
| HomTYK2 | VFSVC-----      | 1187 |
